# Supplementary material for: Alternative and cost-effective adsorbent for detergent removal in membrane protein solubilization
Source: Research Square preprint supplement (doi:10.21203/rs.3.rs-6252728/v1), 2025-04-18

**Supplementary Table 1.** 1:15 and 1:20 ratios of Membrane Protein/Amphipol (MP:Apol) conditions to test PAD600 beads.

| Sample | Detergent | MP/Apol | Mass of Apol (mg) | Apol (µl) | Concentration (mg/ml) | Bead |
| --- | --- | --- | --- | --- | --- | --- |
| Condition 7 | LMNG | 1:15 | 7.5 | 75 | 0.5 | + |
| Condition 8 | LMNG | 1:20 | 10 | 100 | 0.5 | + |

**Supplementary Figure 1.** HPLC chromatograms of MP:Apol mixtures (LMNG) with the ratios of 1:15, 1:20 (A) and SDS-PAGE (12%) analysis result of the 0.5 mg/ml purified FtsH after exchange of the DDM and LMNG with Apol using PAD600 beads (B).


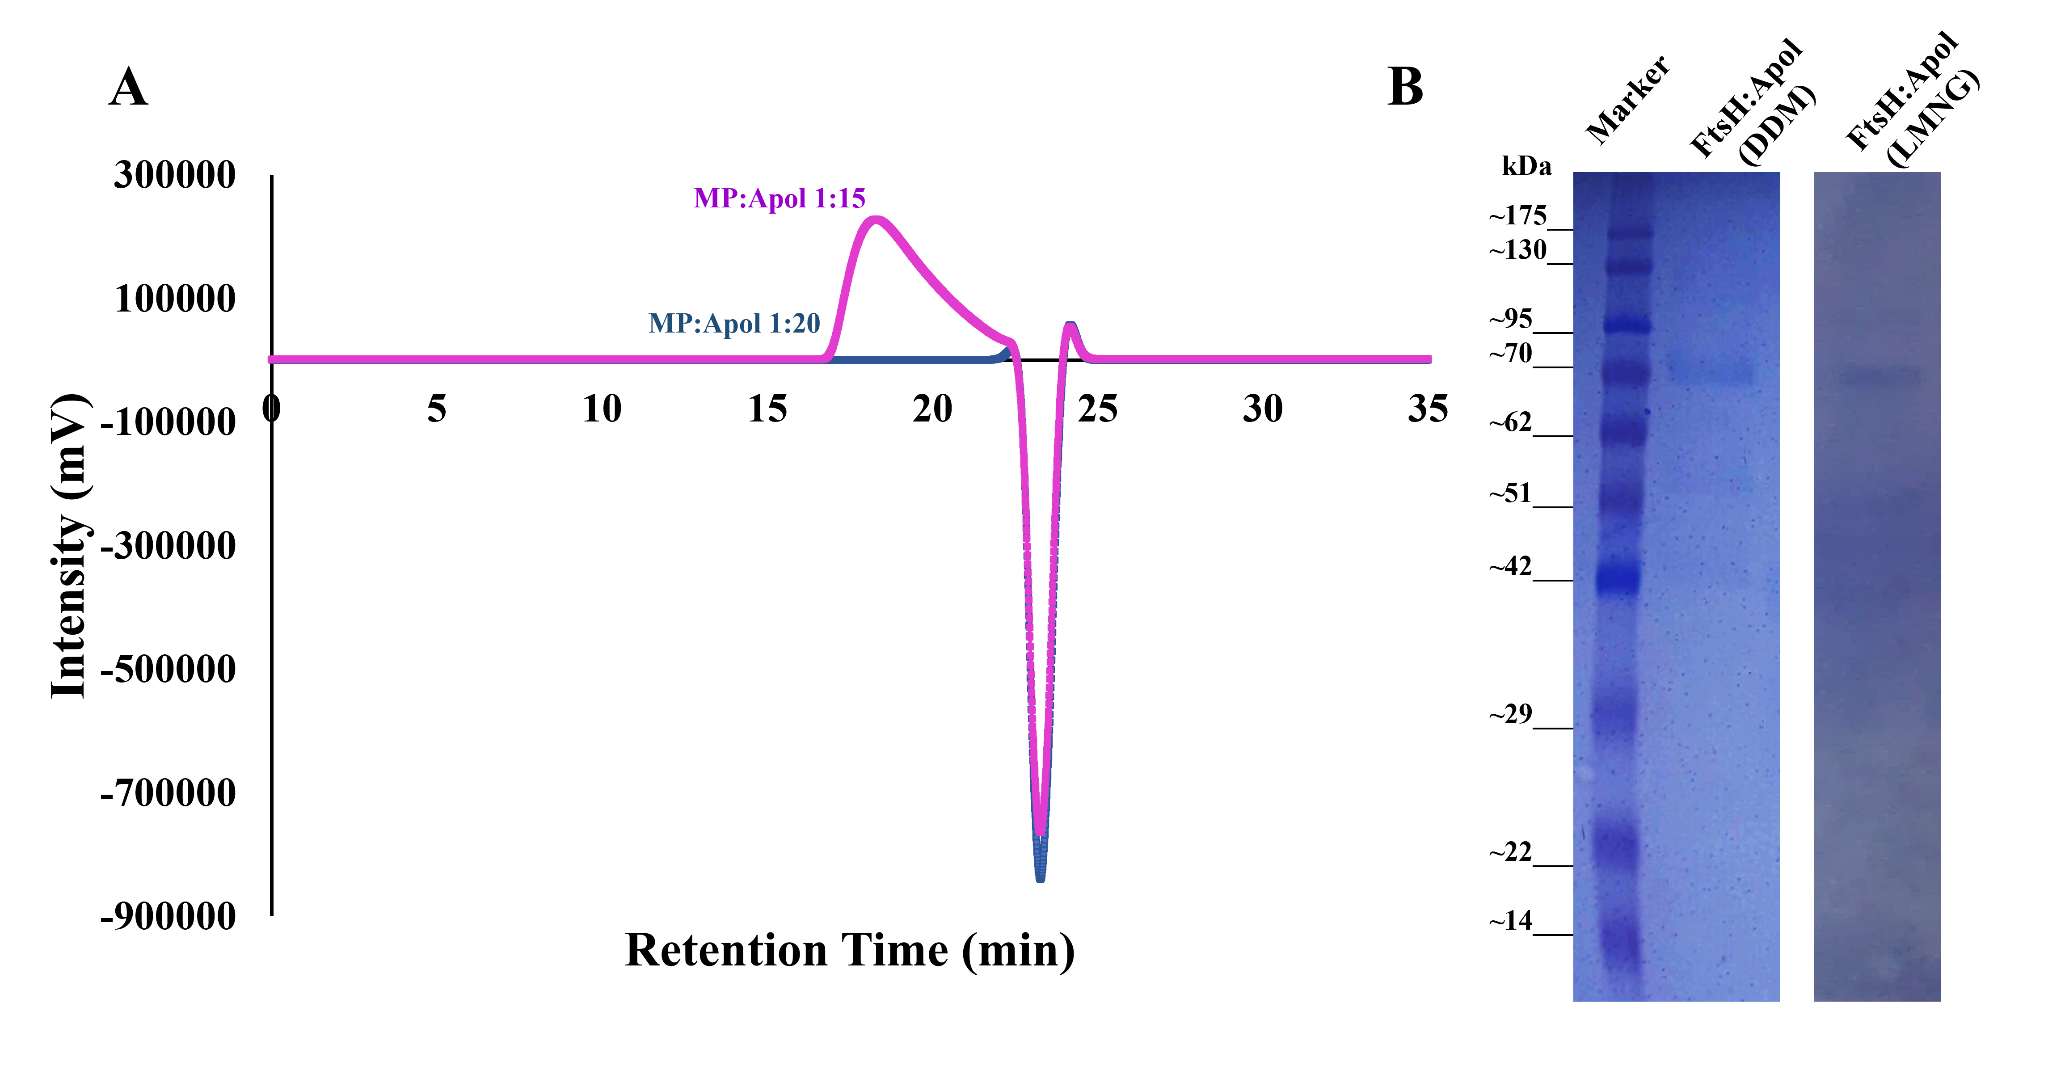

Supplement: Supplementary file 1 [file 1a4ac3785fb94a25aff957ab.docx]
